# Supplementary material for: Design, synthesis and biological evaluation of novel 1,2,4-triazolo and 1,2,4-triazino[4,3-a]quinoxalines as potential anticancer and antimicrobial agents
Source: Royal Society of Chemistry journal article supplement (doi:10.1039/c4md00257a), 2014-09-29

Dose Response Curves

### All Cell Lines

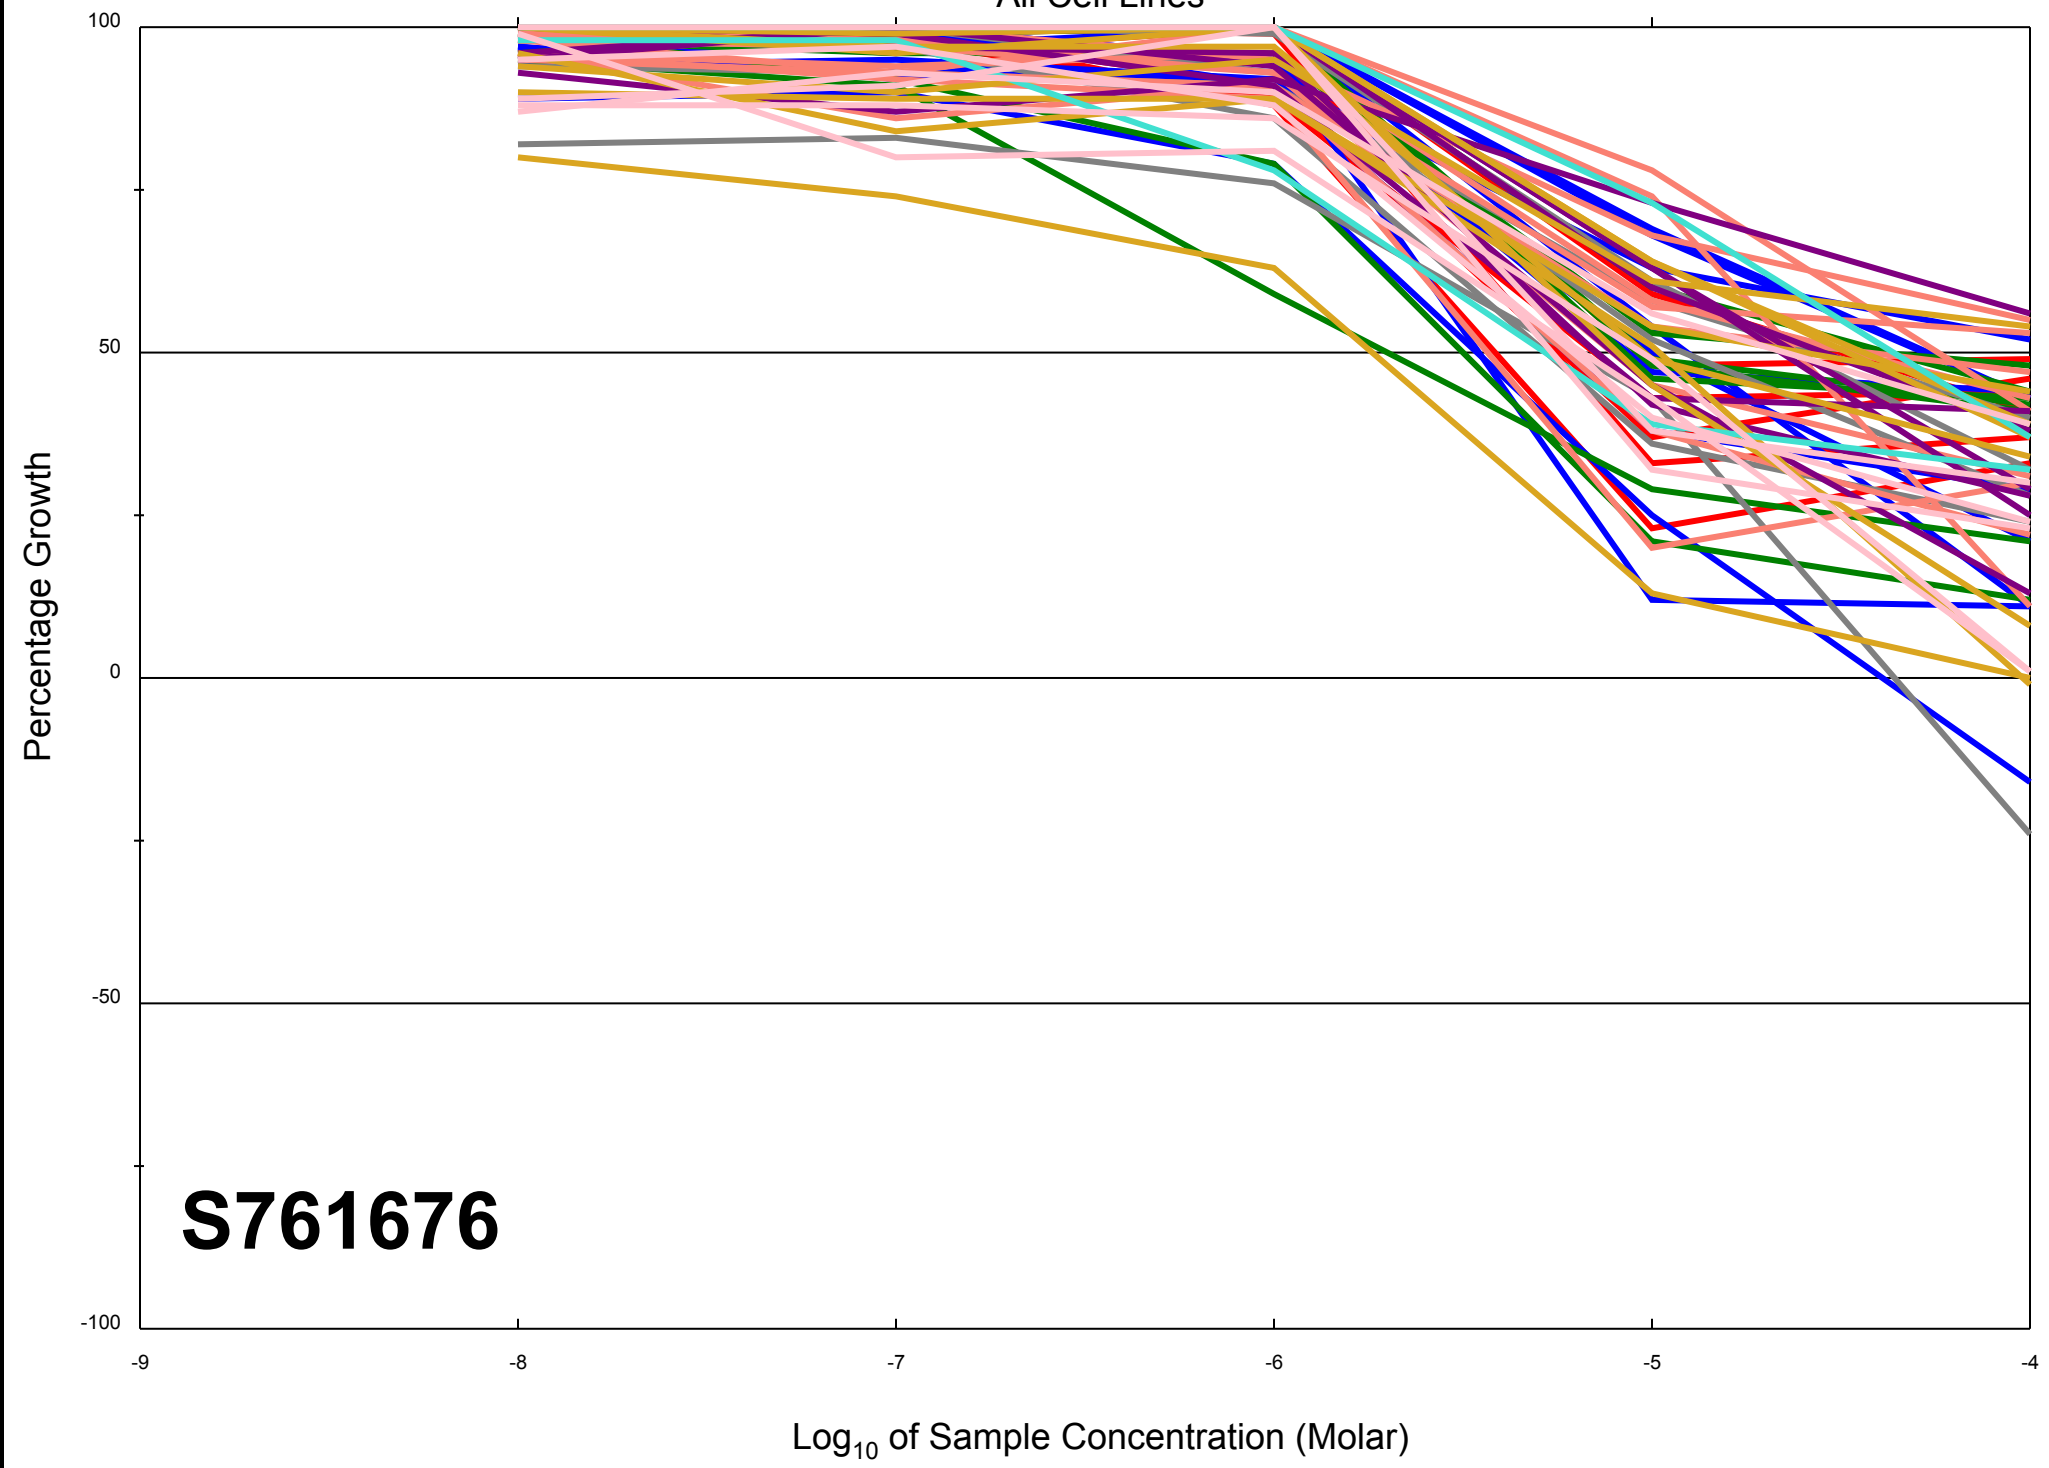

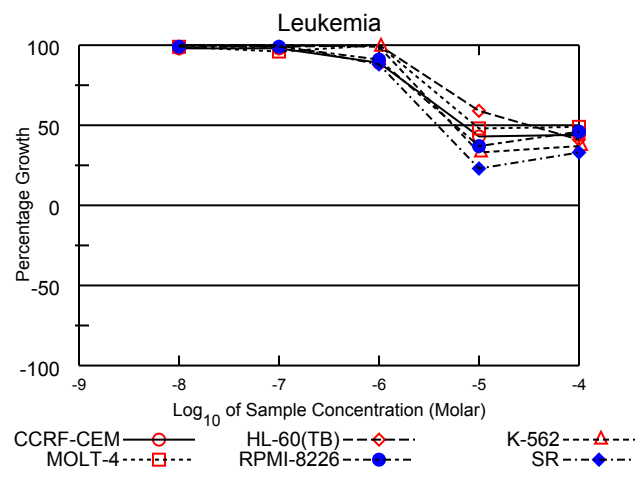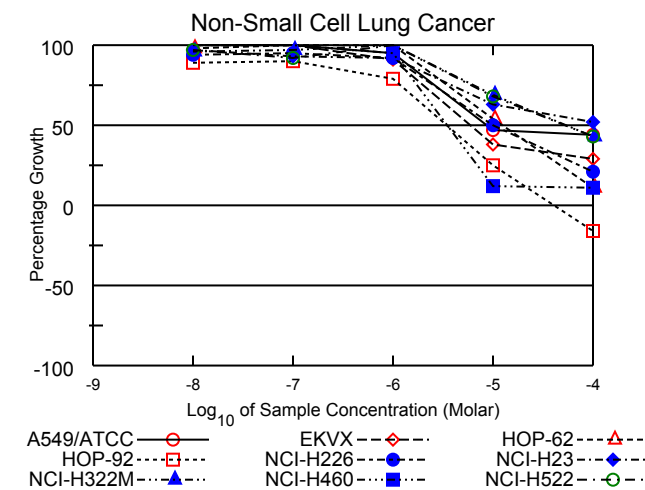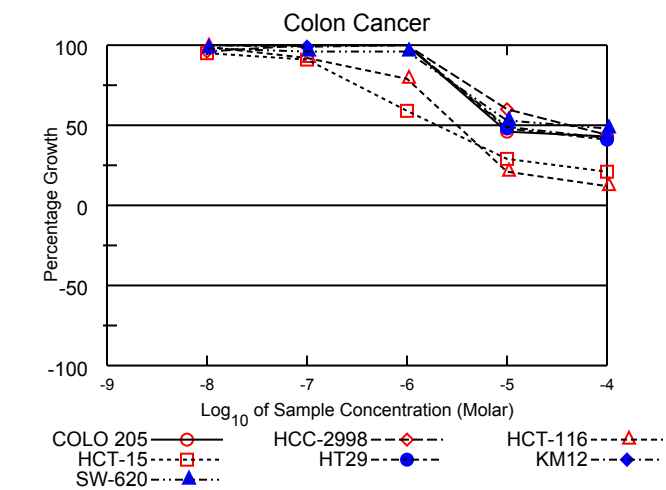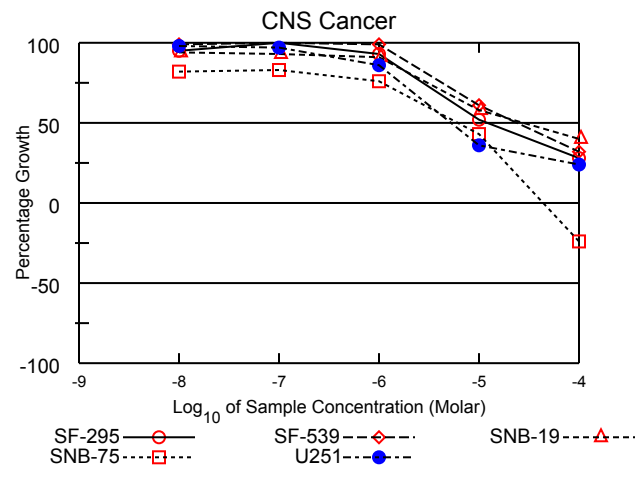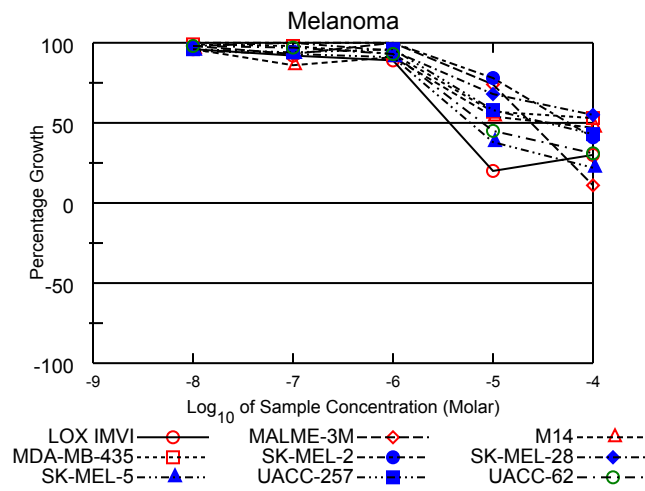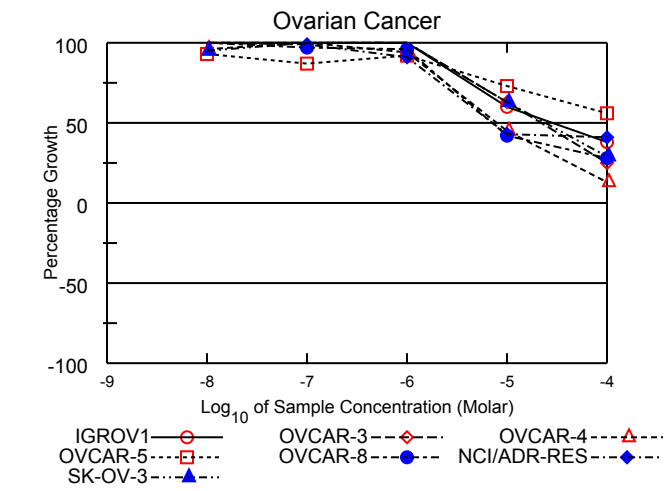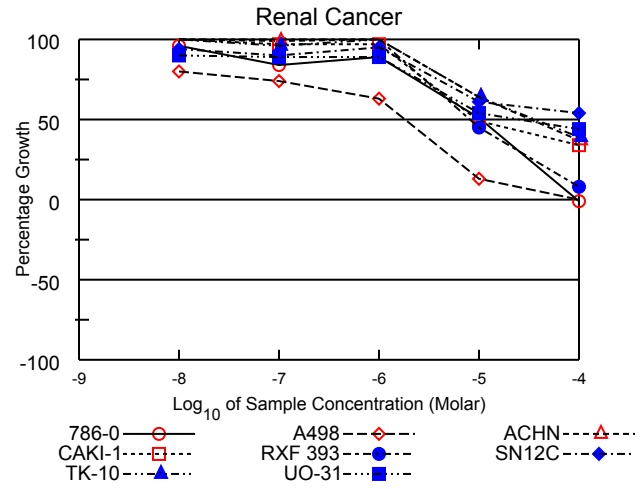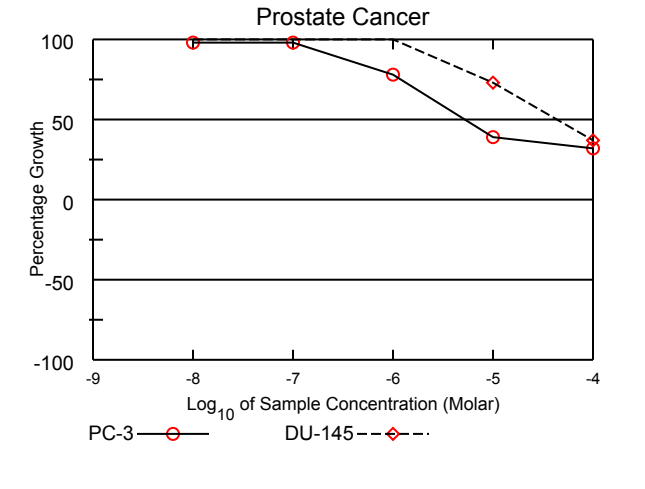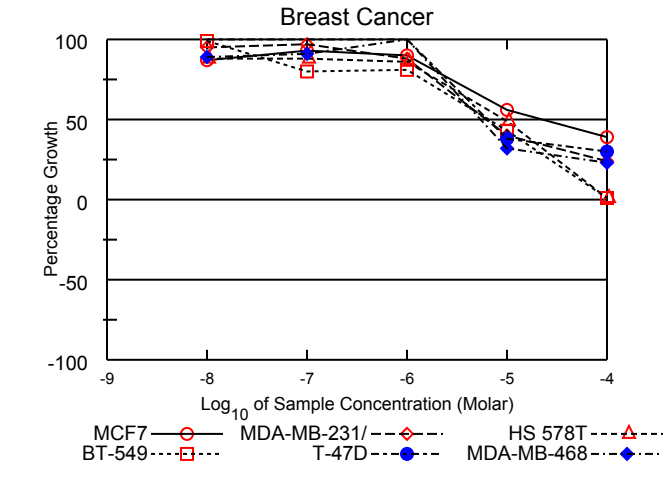



Mean Graphs

Report Date :August 17, 2012

Test Date :February 13, 2012

| Panel/Cell Line                   | Log <sub>10</sub> GI50 | GI50 | Log <sub>10</sub> TGI | TGI | Log <sub>10</sub> LC50 | LC50 |
|-----------------------------------|------------------------|------|-----------------------|-----|------------------------|------|
| <b>Leukemia</b>                   |                        |      |                       |     |                        |      |
| CCRF-CEM                          | -5.15                  |      | > -4.00               |     | > -4.00                |      |
| HL-60(TB)                         | -4.49                  |      | > -4.00               |     | > -4.00                |      |
| K-562                             | -5.26                  |      | > -4.00               |     | > -4.00                |      |
| MOLT-4                            | -5.04                  |      | > -4.00               |     | > -4.00                |      |
| RPMI-8226                         | -5.25                  |      | > -4.00               |     | > -4.00                |      |
| SR                                | -5.41                  |      | > -4.00               |     | > -4.00                |      |
| <b>Non-Small Cell Lung Cancer</b> |                        |      |                       |     |                        |      |
| A549/ATCC                         | -5.06                  |      | > -4.00               |     | > -4.00                |      |
| EKVX                              | -5.22                  |      | > -4.00               |     | > -4.00                |      |
| HOP-62                            | -4.91                  |      | > -4.00               |     | > -4.00                |      |
| HOP-92                            | -5.46                  |      | -4.38                 |     | > -4.00                |      |
| NCI-H226                          | -5.00                  |      | > -4.00               |     | > -4.00                |      |
| NCI-H23                           | > -4.00                |      | > -4.00               |     | > -4.00                |      |
| NCI-H322M                         | -4.27                  |      | > -4.00               |     | > -4.00                |      |
| NCI-H460                          | -5.46                  |      | > -4.00               |     | > -4.00                |      |
| NCI-H522                          | -4.27                  |      | > -4.00               |     | > -4.00                |      |
| <b>Colon Cancer</b>               |                        |      |                       |     |                        |      |
| COLO 205                          | -5.06                  |      | > -4.00               |     | > -4.00                |      |
| HCC-2998                          | -4.37                  |      | > -4.00               |     | > -4.00                |      |
| HCT-116                           | -5.49                  |      | > -4.00               |     | > -4.00                |      |
| HCT-15                            | -5.71                  |      | > -4.00               |     | > -4.00                |      |
| HT29                              | -5.04                  |      | > -4.00               |     | > -4.00                |      |
| KM12                              | -5.02                  |      | > -4.00               |     | > -4.00                |      |
| SW-620                            | -4.36                  |      | > -4.00               |     | > -4.00                |      |
| <b>CNS Cancer</b>                 |                        |      |                       |     |                        |      |
| SF-295                            | -4.91                  |      | > -4.00               |     | > -4.00                |      |
| SF-539                            | -4.62                  |      | > -4.00               |     | > -4.00                |      |
| SNB-19                            | -4.56                  |      | > -4.00               |     | > -4.00                |      |
| SNB-75                            | -5.21                  |      | -4.36                 |     | > -4.00                |      |
| U251                              | -5.29                  |      | > -4.00               |     | > -4.00                |      |
| <b>Melanoma</b>                   |                        |      |                       |     |                        |      |
| LOX IMV1                          | -5.43                  |      | > -4.00               |     | > -4.00                |      |
| MALME-3M                          | -4.62                  |      | > -4.00               |     | > -4.00                |      |
| M14                               | -4.44                  |      | > -4.00               |     | > -4.00                |      |
| MDA-MB-435                        | > -4.00                |      | > -4.00               |     | > -4.00                |      |
| SK-MEL-2                          | -4.25                  |      | > -4.00               |     | > -4.00                |      |
| SK-MEL-28                         | > -4.00                |      | > -4.00               |     | > -4.00                |      |
| SK-MEL-5                          | -5.23                  |      | > -4.00               |     | > -4.00                |      |
| UACC-257                          | -4.46                  |      | > -4.00               |     | > -4.00                |      |
| UACC-62                           | -5.10                  |      | > -4.00               |     | > -4.00                |      |
| <b>Ovarian Cancer</b>             |                        |      |                       |     |                        |      |
| IGROV1                            | -4.56                  |      | > -4.00               |     | > -4.00                |      |
| OVCAR-3                           | -4.66                  |      | > -4.00               |     | > -4.00                |      |
| OVCAR-4                           | -5.10                  |      | > -4.00               |     | > -4.00                |      |
| OVCAR-5                           | > -4.00                |      | > -4.00               |     | > -4.00                |      |
| OVCAR-8                           | -5.14                  |      | > -4.00               |     | > -4.00                |      |
| NCI/ADR-RES                       | -5.15                  |      | > -4.00               |     | > -4.00                |      |
| SK-OV-3                           | -4.62                  |      | > -4.00               |     | > -4.00                |      |
| <b>Renal Cancer</b>               |                        |      |                       |     |                        |      |
| 786-0                             | -4.98                  |      | -4.01                 |     | > -4.00                |      |
| A498                              | -5.74                  |      | > -4.00               |     | > -4.00                |      |
| ACHN                              | -4.47                  |      | > -4.00               |     | > -4.00                |      |
| CAKI-1                            | -5.01                  |      | > -4.00               |     | > -4.00                |      |
| RXF 393                           | -5.07                  |      | > -4.00               |     | > -4.00                |      |
| SN12C                             | > -4.00                |      | > -4.00               |     | > -4.00                |      |
| TK-10                             | -4.43                  |      | > -4.00               |     | > -4.00                |      |
| UO-31                             | -4.60                  |      | > -4.00               |     | > -4.00                |      |
| <b>Prostate Cancer</b>            |                        |      |                       |     |                        |      |
| PC-3                              | -5.28                  |      | > -4.00               |     | > -4.00                |      |
| DU-145                            | -4.35                  |      | > -4.00               |     | > -4.00                |      |
| <b>Breast Cancer</b>              |                        |      |                       |     |                        |      |
| MCF7                              | -4.65                  |      | > -4.00               |     | > -4.00                |      |
| MDA-MB-231/ATCC                   | -5.20                  |      | > -4.00               |     | > -4.00                |      |
| HS 578T                           | -5.02                  |      | > -4.00               |     | > -4.00                |      |
| BT-549                            | -5.17                  |      | > -4.00               |     | > -4.00                |      |
| T-47D                             | -5.17                  |      | > -4.00               |     | > -4.00                |      |
| MDA-MB-468                        | -5.26                  |      | > -4.00               |     | > -4.00                |      |

MID  
Delta  
Range

-4.87  
0.87  
1.74

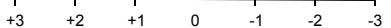

-4.01  
0.37  
0.38

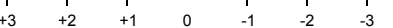

-4.0  
0  
0.0

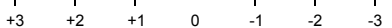

Supplement: c4md00257a1.pdf [file c4md00257a1.pdf]
